# Supplementary material for: Forecasting the potential impact of cell and gene therapies in France: projecting product launches and patients treated
Source: Frontiers journal article supplement (doi:10.3389/fmed.2024.1324602), 2024-02-19

**Figure S1.** Forecasted CGT launches across three scenarios per year in France, 2023-2030.

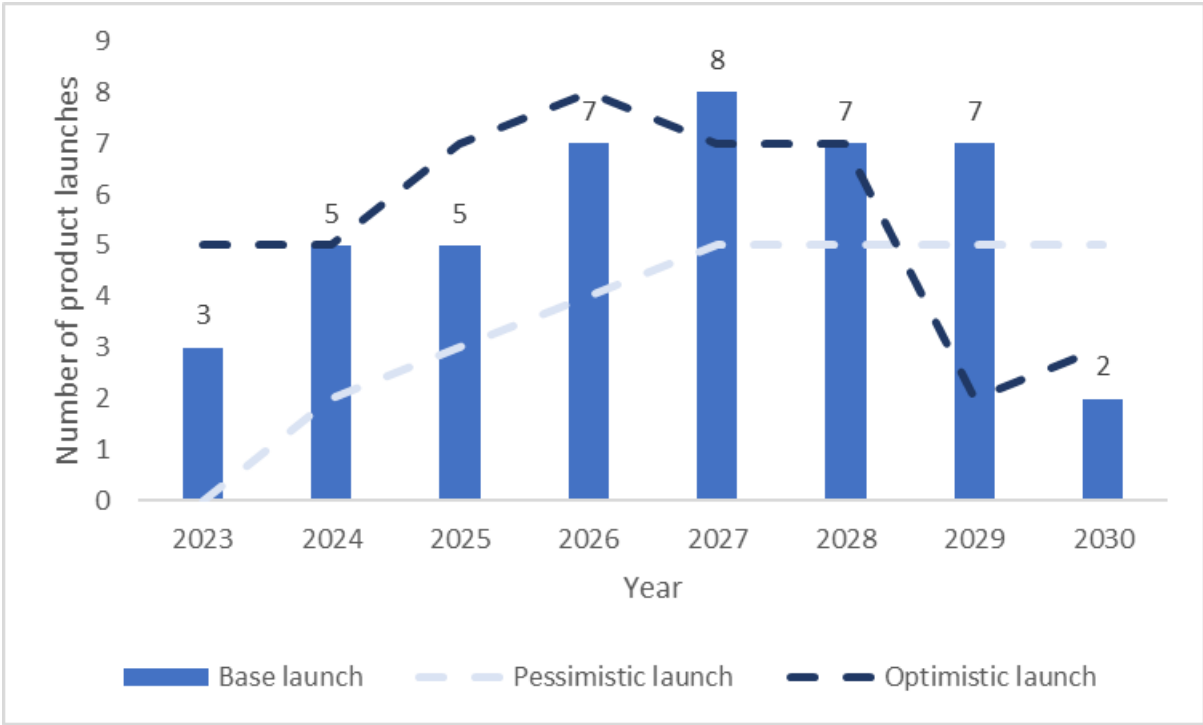

Supplement: Data_Sheet_1.PDF [file Data_Sheet_1.PDF]
